# Supplementary material for: Utilization of Eggshell Membrane and Olive Leaf Extract for the Preparation of Functional Materials
Source: PubMed Central journal article supplement (PMC8069921; doi:10.3390/foods10040806), 2021-04-09
Supplement: foods-10-00806-s001.pdf [file foods-10-00806-s001.pdf]

**Table S1 Results of ANOVA for the prepared experimental design**

| Term             | Coef     | SE Coef  | T      | P      |
|------------------|----------|----------|--------|--------|
| Constant         | 52.5707  | 8.6646   | 6.067  | 0.000  |
| A                | -0.1656  | 0.1373   | -1.206 | 0.0245 |
| B                | -6.2556  | 13.8297  | -0.452 | 0.657  |
| C*               | -8.5237  | 4.7340   | -1.801 | 0.091  |
| D                | 19.4847  | 47.3404  | 0.412  | 0.686  |
| A <sup>2</sup>   | 0.0036   | 0.0012   | 3.065  | 0.007  |
| B <sup>2</sup>   | 0.2133   | 5.2906   | 0.040  | 0.968  |
| C <sup>2</sup> * | 1.4050   | 0.7440   | 1.888  | 0.077  |
| D <sup>2</sup>   | -72.0000 | 74.03997 | -0.968 | 0.348  |
| AB               | 0.0367   | 0.0320   | 1.147  | 0.268  |
| AC               | 0.0137   | 0.0120   | 1.147  | 0.268  |
| AD               | 0.1125   | 0.1199   | 0.939  | 0.362  |
| BC               | -0.2500  | 0.7990   | -0.313 | 0.758  |
| BD               | 12.5000  | 7.9903   | 1.564  | 0.137  |
| CD               | 1.5625   | 2.9964   | 0.521  | 0.609  |

S = 4.79417 PRESS = 1418.39; R<sup>2</sup>=0.9408 R-Sq(pred) = 77.18% R-Sq(adj) = 88.91%;\*R<sup>2</sup>=0.92

**Table S2 Independent variables and their levels used for CCD**

| Independent Variables        | Unit | Factors Symbol | Coded Levels |    |
|------------------------------|------|----------------|--------------|----|
| Liquid/Solid Ratio(L/S)      | -    | X1             | -1           | 1  |
| Treatment Time in the Column | hour | X2             | 10           | 30 |
| Ethanol Concentration        | %    | X3             | 6            | 24 |
|                              |      |                | 0            | 80 |

**Table S3. Response Surface Regression: Antioxidant Capacity versus L/S Ratio; Time (hr);**

Estimated Regression Coefficients for Antioxidant capacity

| Term                           | Coef    | SE Coef | T      | P     |
|--------------------------------|---------|---------|--------|-------|
| Constant                       | 9312.70 | 2649.11 | 3.515  | 0.006 |
| X <sub>1</sub>                 | -93.02  | 274.31  | -0.339 | 0.742 |
| X <sub>2</sub>                 | 490.16  | 218.79  | 2.240  | 0.049 |
| X <sub>3</sub>                 | -119.77 | 48.16   | -2.487 | 0.032 |
| X <sub>1</sub> <sup>2</sup>    | -0.17   | 6.54    | -0.025 | 0.980 |
| X <sub>2</sub> <sup>2</sup>    | -21.51  | 6.54    | -3.288 | 0.008 |
| X <sub>3</sub> <sup>2</sup>    | 1.93    | 0.41    | 4.716  | 0.001 |
| X <sub>1</sub> .X <sub>2</sub> | 4.29    | 3.84    | 1.120  | 0.289 |
| X <sub>1</sub> .X <sub>3</sub> | 1.48    | 0.96    | 1.543  | 0.154 |
| X <sub>2</sub> .X <sub>3</sub> | 1.21    | 0.96    | 1.265  | 0.235 |

S = 1084,76 PRESS = 85852664

R-Sq = 95.85% R-Sq(pred) = 69.75% R-Sq(adj) = 92.12%

Analysis of Variance for Antioxidant

| Source         | DF | Seq SS      | Adj SS      | Adj MS     | F     | P     |
|----------------|----|-------------|-------------|------------|-------|-------|
| Regression     | 9  | 272,047,514 | 272,047,514 | 30,227,502 | 25.69 | 0.000 |
| Linear         | 3  | 235,079,966 | 11,031,132  | 3,677,044  | 3.12  | 0.075 |
| Square         | 3  | 30,809,714  | 30,809,714  | 10,269,905 | 8.73  | 0.004 |
| Interaction    | 3  | 6,157,834   | 61,57,834   | 2,052,611  | 1.74  | 0.221 |
| Residual Error | 10 | 11,767,102  | 11,767,102  | 1,176,710  |       |       |
| Lack-of-Fit    | 5  | 11,085,380  | 11,085,380  | 2,217,076  | 16.26 | 0.004 |
| Pure Error     | 5  | 681,722     | 681,722     | 136,344    |       |       |
| Total          | 19 | 283,814,616 |             |            |       |       |

Unusual Observations for Antioxidant

| Obs | StdOrder | Antioxidant | Fit       | SE Fit  | Residual | St Resid |
|-----|----------|-------------|-----------|---------|----------|----------|
| 16  | 14       | 22474.000   | 20324.618 | 760.038 | 2149.382 | 2.78 R   |

R denotes an observation with a large standardized residual.

Predicted Response for New Design Points Using Model for Antioxidant

| Point | Fit     | SE Fit  | 95% CI             | 95% PI             |
|-------|---------|---------|--------------------|--------------------|
| 1     | 9697.3  | 966.098 | ( 7544.7; 11849.9) | ( 6460.7; 12933.9) |
| 2     | 10342.0 | 760.038 | ( 8648.5; 12035.5) | ( 7390.8; 13293.2) |
| 3     | 10171.6 | 760.038 | ( 8478.1; 11865.1) | ( 7220.4; 13122.8) |
| 4     | 10660.0 | 760.038 | ( 8966.5; 12353.5) | ( 7708.8; 13611.2) |
| 5     | 8428.9  | 966.098 | ( 6276.3; 10581.5) | ( 5192.3; 11665.5) |
| 6     | 12407.5 | 372.915 | (11576.5; 13238.4) | ( 9851.6; 14963.3) |
| 7     | 19965.1 | 966.098 | (17812.5; 22117.7) | (16728.5; 23201.7) |
| 8     | 17149.5 | 966.098 | (14996.9; 19302.1) | (13912.9; 20386.1) |
| 9     | 12407.5 | 372.915 | (11576.5; 13238.4) | ( 9851.6; 14963.3) |
| 10    | 17208.4 | 966.098 | (15055.8; 19361.0) | (13971.8; 20445.0) |
| 11    | 12407.5 | 372.915 | (11576.5; 13238.4) | ( 9851.6; 14963.3) |

|    |         |         |                    |                    |
|----|---------|---------|--------------------|--------------------|
| 12 | 12407.5 | 372.915 | (11576.5; 13238.4) | ( 9851.6; 14963.3) |
| 13 | 12407.5 | 372.915 | (11576.5; 13238.4) | ( 9851.6; 14963.3) |
| 14 | 7697.9  | 966.098 | ( 5545.3; 9850.5)  | ( 4461.3; 10934.5) |
| 15 | 12777.6 | 760.038 | (11084.1; 14471.1) | ( 9826.4; 15728.8) |
| 16 | 20324.6 | 760.038 | (18631.1; 22018.1) | (17373.4; 23275.8) |
| 17 | 8147.0  | 966.098 | ( 5994.4; 10299.6) | ( 4910.4; 11383.6) |
| 18 | 12407.5 | 372.915 | (11576.5; 13238.4) | ( 9851.6; 14963.3) |
| 19 | 18306.5 | 966.098 | (16153.9; 20459.1) | (15069.9; 21543.1) |
| 20 | 12004.0 | 760.038 | (10310.5; 13697.5) | ( 9052.8; 14955.2) |

**Analysis of Variance for Antioxidant Capacity (R<sup>2</sup>=0.9585)**

| Source         | DF | Seq SS      | Adj SS      | Adj MS     | F     | P     |
|----------------|----|-------------|-------------|------------|-------|-------|
| Regression     | 9  | 272,047,514 | 27,2047,514 | 30,227,502 | 25.69 | 0.000 |
| Linear         | 3  | 235,079,966 | 11,031,132  | 3,677,044  | 3.12  | 0.075 |
| Square         | 3  | 30,809,714  | 30,809,714  | 10,269,905 | 8.73  | 0.004 |
| Interaction    | 3  | 6,157,834   | 6157834     | 2,052,611  | 1.74  | 0.221 |
| Residual Error | 10 | 11,767,102  | 11,767,102  | 1,176,710  |       |       |
| Lack-of-Fit    | 5  | 11,085,380  | 11,085,380  | 2,217,076  | 16.26 | 0.004 |
| Pure Error     | 5  | 681,722     | 681,722     | 136,344    |       |       |
| Total          | 19 | 28,3814,616 |             |            |       |       |

**Table S4. Response Surface Regression: TPC versus L/S Ratio; Time (hr);**

Estimated Regression Coefficients for Total Phenol Content

| Term                           | Coef      | SE Coef  | T      | P     |
|--------------------------------|-----------|----------|--------|-------|
| Constant                       | 0.105738  | 0.047151 | 2.243  | 0.049 |
| X <sub>1</sub>                 | -0.002571 | 0.004882 | -0.527 | 0.610 |
| X <sub>2</sub>                 | 0.002010  | 0.003894 | 0.516  | 0.617 |
| X <sub>3</sub>                 | 0.002304  | 0.000857 | 2.688  | 0.023 |
| X <sub>1</sub> <sup>2</sup>    | 0.000077  | 0.000116 | 0.660  | 0.524 |
| X <sub>2</sub> <sup>2</sup>    | -0.000123 | 0.000116 | -1.058 | 0.315 |
| X <sub>3</sub> <sup>2</sup>    | -0.000019 | 0.000007 | -2.604 | 0.026 |
| X <sub>1</sub> .X <sub>2</sub> | 0.000019  | 0.000068 | 0.275  | 0.789 |
| X <sub>1</sub> .X <sub>3</sub> | -0.000004 | 0.000017 | -0.238 | 0.817 |
| X <sub>2</sub> .X <sub>3</sub> | -0.000002 | 0.000017 | -0.128 | 0.901 |

S = 0.0193076 PRESS = 0.0139841

R-Sq = 72.29% R-Sq(pred) = 0.00% R-Sq(adj) = 47.35%

Analysis of Variance for Total Pheenol Content

| Source         | DF | Seq SS   | Adj SS   | Adj MS   | F    | P     |
|----------------|----|----------|----------|----------|------|-------|
| Regression     | 9  | 0.009726 | 0.009726 | 0.001081 | 2.90 | 0.056 |
| Linear         | 3  | 0.003745 | 0.003262 | 0.001087 | 2.92 | 0.087 |
| Square         | 3  | 0.005925 | 0.005925 | 0.001975 | 5.30 | 0.019 |
| Interaction    | 3  | 0.000055 | 0.000055 | 0.000018 | 0.05 | 0.985 |
| Residual Error | 10 | 0.003728 | 0.003728 | 0.000373 |      |       |
| Lack-of-Fit    | 5  | 0.000754 | 0.000754 | 0.000151 | 0.25 | 0.921 |
| Pure Error     | 5  | 0.002974 | 0.002974 | 0.000595 |      |       |
| Total          | 19 | 0.013454 |          |          |      |       |

Unusual Observations for Total Phenol Content

Total

| Obs | StdOrder | phenol | Fit   | SE Fit | Residual | St Resid |
|-----|----------|--------|-------|--------|----------|----------|
| 13  | 17       | 0.109  | 0.155 | 0.007  | -0.046   | -2.55 R  |

R denotes an observation with a large standardized residual.

Predicted Response for New Design Points Using Model for Total Phenol Content

| Point | Fit      | SE Fit    | 95% CI               | 95% PI               |
|-------|----------|-----------|----------------------|----------------------|
| 1     | 0.116248 | 0.0171955 | (0.077934; 0.154562) | (0.058640; 0.173856) |
| 2     | 0.157109 | 0.0135279 | (0.126967; 0.187251) | (0.104580; 0.209638) |
| 3     | 0.128709 | 0.0135279 | (0.098567; 0.158851) | (0.076180; 0.181238) |
| 4     | 0.113109 | 0.0135279 | (0.082967; 0.143251) | (0.060580; 0.165638) |
| 5     | 0.127348 | 0.0171955 | (0.089034; 0.165662) | (0.069740; 0.184956) |
| 6     | 0.155227 | 0.0066375 | (0.140438; 0.170017) | (0.109736; 0.200718) |
| 7     | 0.123048 | 0.0171955 | (0.084734; 0.161362) | (0.065440; 0.180656) |
| 8     | 0.110948 | 0.0171955 | (0.072634; 0.149262) | (0.053340; 0.168556) |
| 9     | 0.155227 | 0.0066375 | (0.140438; 0.170017) | (0.109736; 0.200718) |
| 10    | 0.144848 | 0.0171955 | (0.106534; 0.183162) | (0.087240; 0.202456) |
| 11    | 0.155227 | 0.0066375 | (0.140438; 0.170017) | (0.109736; 0.200718) |
| 12    | 0.155227 | 0.0066375 | (0.140438; 0.170017) | (0.109736; 0.200718) |

|    |          |           |                      |                      |
|----|----------|-----------|----------------------|----------------------|
| 13 | 0.155227 | 0.0066375 | (0.140438; 0.170017) | (0.109736; 0.200718) |
| 14 | 0.085848 | 0.0171955 | (0.047534; 0.124162) | (0.028240; 0.143456) |
| 15 | 0.168709 | 0.0135279 | (0.138567; 0.198851) | (0.116180; 0.221238) |
| 16 | 0.136709 | 0.0135279 | (0.106567; 0.166851) | (0.084180; 0.189238) |
| 17 | 0.104448 | 0.0171955 | (0.066134; 0.142762) | (0.046840; 0.162056) |
| 18 | 0.155227 | 0.0066375 | (0.140438; 0.170017) | (0.109736; 0.200718) |
| 19 | 0.149448 | 0.0171955 | (0.111134; 0.187762) | (0.091840; 0.207056) |
| 20 | 0.157109 | 0.0135279 | (0.126967; 0.187251) | (0.104580; 0.209638) |

**Analysis of Variance for Total Phenol Content (R<sup>2</sup>=0.7229)**

| Source         | DF | Seq SS   | Adj SS   | Adj MS   | F    | P     |
|----------------|----|----------|----------|----------|------|-------|
| Regression     | 9  | 0.009726 | 0.009726 | 0.001081 | 2.90 | 0.056 |
| Linear         | 3  | 0.003745 | 0.003262 | 0.001087 | 2.92 | 0.087 |
| Square         | 3  | 0.005925 | 0.005925 | 0.001975 | 5.30 | 0.019 |
| Interaction    | 3  | 0.000055 | 0.000055 | 0.000018 | 0.05 | 0.985 |
| Residual Error | 10 | 0.003728 | 0.003728 | 0.000373 |      |       |
| Lack-of-Fit    | 5  | 0.000754 | 0.000754 | 0.000151 | 0.25 | 0.921 |
| Pure Error     | 5  | 0.002974 | 0.002974 | 0.000595 |      |       |
| Total          | 19 | 0.013454 |          |          |      |       |

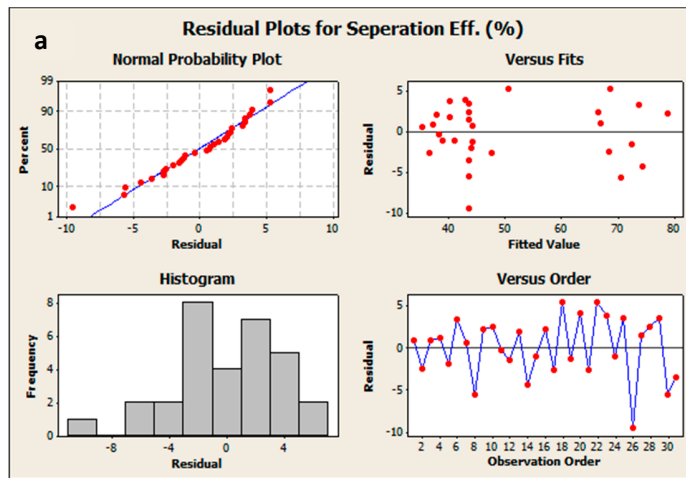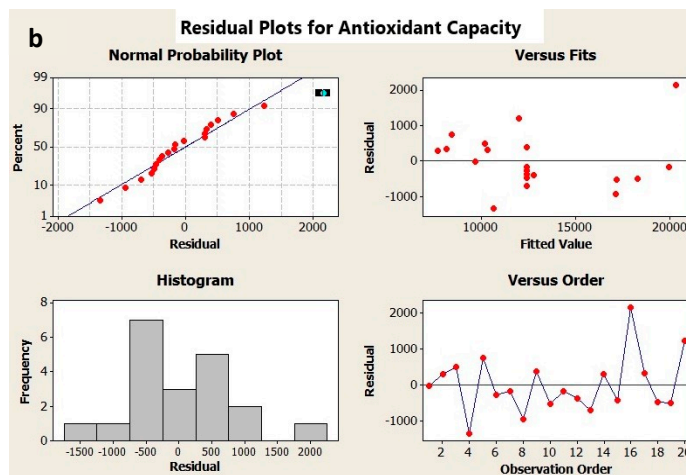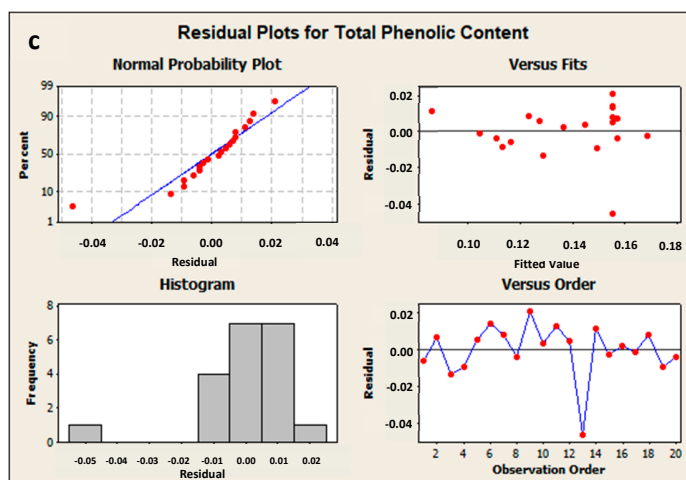

Figure S1 Residual Plots for the Separation Efficency(a).Total Phenol Content(b) and Total Antioxidant Capacity(c)
